# Supplementary material for: The Effect of a Temporary Stoma on Long-term Functional Outcomes Following Surgery for Rectal Cancer
Source: PubMed Central journal article supplement (PMC10769172; doi:10.1097/dcr.0000000000003009), 2023-12-20
Supplement: dcr-67-0291-s002.pdf [file dcr-67-0291-s002.pdf]

**Supplemental Digital Content 1. Temporary stomas in the responders and non-responders**

|                 | <b>Responders</b><br>No. (%) | <b>Non-responders</b><br>No. (%) | <b><i>p</i> value</b> |
|-----------------|------------------------------|----------------------------------|-----------------------|
| <b>Overall</b>  | 656 (100.0)                  | 103 (100.0)                      |                       |
| Temporary stoma |                              |                                  |                       |
| No              | 318 (48.5)                   | 49 (48.0)                        | 0.932                 |
| Ileostomy       | 208 (31.7)                   | 34 (33.3)                        |                       |
| Colostomy       | 130 (19.8)                   | 19 (18.6)                        |                       |
