# Supplementary material for: The Effect of a Temporary Stoma on Long-term Functional Outcomes Following Surgery for Rectal Cancer
Source: PubMed Central journal article supplement (PMC10769172; doi:10.1097/dcr.0000000000003009), 2023-12-20
Supplement: dcr-67-0291-s003.pdf [file dcr-67-0291-s003.pdf]

## Supplemental Digital Content 2. Reported reasons for constructing a temporary stoma

|                                                     | Ileostomy<br>No. (%) | Colostomy<br>No. (%) |
|-----------------------------------------------------|----------------------|----------------------|
| <b>Overall</b>                                      | 208 (100.0)          | 130 (100.0)          |
| Bowel obstruction and needing neoadjuvant treatment | 2 (1.0)              | 27 (20.8)            |
| Bowel inflammation                                  | 0 (0.0)              | 1 (0.8)              |
| According to preoperative plan                      | 5 (2.4)              | 0 (0.0)              |
| Neoadjuvant radiotherapy                            | 34 (16.3)            | 20 (15.4)            |
| Avoiding traction on colon                          | 1 (0.5)              | 0 (0.0)              |
| Comorbidity/condition/extensive surgical procedure  | 0 (0.0)              | 10 (7.7)             |
| (Very) low anastomosis                              | 25 (12.0)            | 24 (18.5)            |
| Questionable condition anastomosis                  | 5 (2.4)              | 18 (13.8)            |
| Emergency setting                                   | 0 (0.0)              | 8 (6.2)              |
| Anastomotic leakage                                 | 9 (4.3)              | 7 (5.4)              |
| Not reported                                        | 127 (61.1)           | 15 (11.5)            |
