# Supplementary material for: The Effect of a Temporary Stoma on Long-term Functional Outcomes Following Surgery for Rectal Cancer
Source: PubMed Central journal article supplement (PMC10769172; doi:10.1097/dcr.0000000000003009), 2023-12-20
Supplement: dcr-67-0291-s004.pdf [file dcr-67-0291-s004.pdf]

**Supplemental Digital Content 3. Correlations between time to stoma reversal and quality of life**

|                            | <b>Spearman<br/>correlation coefficient<br/>rho</b> | <b>p value</b> |
|----------------------------|-----------------------------------------------------|----------------|
| Physical functioning       | -0.042                                              | 0.454          |
| Role – physical            | -0.027                                              | 0.634          |
| Bodily pain                | -0.120                                              | 0.031 *        |
| Mental health              | -0.047                                              | 0.406          |
| Role – emotional           | -0.030                                              | 0.597          |
| Social functioning         | -0.063                                              | 0.264          |
| Vitality                   | -0.120                                              | 0.033 *        |
| General health perceptions | -0.074                                              | 0.187          |

\* Statistical significance of  $p < 0.05$
